# Supplementary material
Source: PubMed Central journal article supplement (PMC3889754)

**Supplemental Table 1. Patient and specimen characteristics for the clinical plasma samples tested in this study.**

| Sample # | Patient #  | Age | Viral load <sup>a</sup> | Diagnosis | CMV status | Anti-CMV drugs | Reference Laboratory Test <sup>b</sup> | NGS: DRM (% variant) | Predicted Resistance | NGS: Putative Mutant (%variant)               |
|----------|------------|-----|-------------------------|-----------|------------|----------------|----------------------------------------|----------------------|----------------------|-----------------------------------------------|
| AA8_20   | Patient-01 | 65  | 1753                    | HSCT      | D-/R+      | GCV, FOS, CDV  | unable to amplify (+21 day)            | NONE                 | NA                   | NONE                                          |
| AA7_03   | Patient-01 | 65  | 820                     | HSCT      | D-/R+      | GCV, FOS, CDV  | unable to amplify (+1 day)             | NONE                 | NA                   | NONE                                          |
| AA5_17   | Patient-03 | 43  | 899                     | HSCT      | D-/R+      | GCV, FOS       | NO                                     | NONE                 | NA                   | NONE                                          |
| AA7_19   | Patient-04 | 61  | 918                     | LUNG      | R-         | VCV, GCV       | NO                                     | NONE                 | NA                   | UL54: K513R (99.5), R1037C (99.0); UL97: NONE |
| AA7_09   | Patient-05 | 37  | 11157                   | HIV/AIDS  | NA         | VCV, GCV, CDV  | NO                                     | NONE                 | NA                   | NONE                                          |
| AA8_13   | Patient-05 | 37  | 6258                    | HIV/AIDS  | NA         | VCV, GCV, CDV  | NO                                     | NONE                 | NA                   | NONE                                          |
| AA7_01   | Patient-06 | 74  | 770                     | LUNG      | UNKNOWN    | VCV, GCV       | NO                                     | NONE                 | NA                   | NONE                                          |
| AA7_21   | Patient-07 | 47  | 4258                    | LIVER     | R+         | VCV            | NO                                     | NONE                 | NA                   | UL54: M637I (98.1); UL97: NONE                |
| AA5_24   | Patient-08 | 16  | 493                     | HSCT      | R-         | VCV            | NO                                     | NONE                 | NA                   | UL54: G531S (100); UL97: NONE                 |
| AA5_21   | Patient-09 | 20  | 394                     | KIDNEY    | UNKNOWN    | VCV            | NO                                     | NONE                 | NA                   | NONE                                          |
| AA8_01   | Patient-10 | 71  | 12584                   | HSCT      | D-/R+      | VCV, FOS       | NO                                     | NONE                 | NA                   | NONE                                          |
| AA7_18   | Patient-11 | 56  | 5371                    | HSCT      | D+/R+      | VCV            | NO                                     | NONE                 | NA                   | NONE                                          |
| AA8_07   | Patient-11 | 56  | 7506                    | HSCT      | D+/R+      | VCV            | NO                                     | NONE                 | NA                   | NONE                                          |
| AA5_23   | Patient-12 | 49  | 706                     | HSCT      | D+/R+      | VCV, GCV, FOS  | NO                                     | NONE                 | NA                   | UL54: R1037C (100); UL97: NONE                |
| AA8_10   | Patient-13 | 57  | 6685                    | HSCT      | D+/R+      | FOS, GCV       | NO                                     | NONE                 | NA                   | NONE                                          |
| AA7_17   | Patient-13 | 57  | 5831                    | HSCT      | D+/R+      | FOS, GCV       | NO                                     | NONE                 | NA                   | NONE                                          |
| AA8_15   | Patient-14 | 66  | 2719                    | HSCT      | R+         | VCV, GCV       | NO                                     | NONE                 | NA                   | NONE                                          |
| AA7_22   | Patient-15 | 71  | 3663                    | LUNG      | UNKNOWN    | VCV, GCV       | unable to amplify (+6 days)            | NONE                 | NA                   | NONE                                          |
| AA8_06   | Patient-15 | 71  | 1831                    | LUNG      | UNKNOWN    | VCV, GCV       | unable to amplify (-5 days)            | NONE                 | NA                   | NONE                                          |
| AA8_05   | Patient-16 | 67  | 2191011                 | HEART     | UNKNOWN    | FOS            | Negative (-3 days)                     | NONE                 | NA                   | NONE                                          |
| AA8_04   | Patient-17 | 67  | 1247                    | HSCT      | D-/R+      | VCV, GCV,      | NO                                     | NONE                 | NA                   | UL54: H556R (21.4), G974S (21.5); UL97: NONE  |
| AA7_23   | Patient-18 | 27  | 130337                  | OTHER     | NA         | VCV, GCV       | NO                                     | NONE                 | NA                   | NONE                                          |
| AA8_11   | Patient-19 | 42  | 731                     | HSCT      | R+         | GCV            | NO                                     | NONE                 | NA                   | UL54: V873A (31.9), H465Y (55.1); UL97: NONE  |
| AA7_20   | Patient-20 | 66  | 50337                   | KIDNEY    | R+         | VCV            | NO                                     | NONE                 | NA                   | NONE                                          |
| AA5_19   | Patient-21 | 57  | 1030                    | HSCT      | UNKNOWN    | VCV            | NO                                     | NONE                 | NA                   | UL54: R800C (98.1%), P642L(50.9%); UL97: NONE |

| Sample # | Patient #  | Age | Viral load <sup>a</sup> | Diagnosis | CMV status | Anti-CMV drugs | Reference Laboratory Test <sup>b</sup>      | NGS: DRM (% variant)                   | Predicted Resistance | NGS: Putative Mutant (%variant)              |
|----------|------------|-----|-------------------------|-----------|------------|----------------|---------------------------------------------|----------------------------------------|----------------------|----------------------------------------------|
| AA8_21   | Patient-22 | 5M  | 967                     | LIVER     | UNKNOWN    | VCV, CDV,      | NO                                          | NONE                                   | NA                   | NONE                                         |
| AA8_08   | Patient-23 | 58  | 6112                    | HSCT      | D+/R+      | GCV            | NO                                          | NONE                                   | NA                   | UL54: P656S (20.1); A269V (33); UL97: NONE   |
| AA8_16   | Patient-24 | 57  | 1742                    | HSCT      | R+         | VCV            | NO                                          | NONE                                   | NA                   | UL54: 2545:G/- del (52.4); UL97: NONE        |
| AA7_07   | Patient-25 | 63  | 16629                   | HSCT      | D-/R+      | GCV, FOS       | negative (-5 days)                          | NONE                                   | NA                   | NONE                                         |
| AA7_06   | Patient-25 | 63  | 11798                   | HSCT      | D-/R+      | GCV, FOS       | negative (+2 days)                          | NONE                                   | NA                   | NONE                                         |
| AA8_09   | Patient-26 | 23  | 4191                    | HSCT      | D+/R+      | GCV            | negative (+8 days)                          | NONE                                   | NA                   | NONE                                         |
| AA8_12   | Patient-26 | 23  | 1382                    | HSCT      | D+/R+      | GCV            | negative (+2 days)                          | NONE                                   | NA                   | NONE                                         |
| AA7_04   | Patient-27 | 63  | 5528                    | HSCT      | D+/R+      | VCV            | NO                                          | NONE                                   | NA                   | NONE                                         |
| AA8_22   | Patient-28 | 44  | 1404                    | HSCT      | D-/R+      | FOS, GCV       | NO                                          | NONE                                   | NA                   | UL54: T892A (29.6); A492T (21.7), UL97: NONE |
| AA7_05   | Patient-28 | 44  | 2921                    | HSCT      | D-/R+      | FOS, GCV       | unable to amplify (+1 day)                  | NONE                                   | NA                   | NONE                                         |
| AA8_17   | Patient-28 | 44  | 1371                    | HSCT      | D-/R+      | VCV, GCV, CDV  | unable to amplify (+7 days)                 | UL97: C592G (15.6)                     | GCV                  | NONE                                         |
| AA7_08   | Patient-28 | 44  | 933                     | HSCT      | D-/R+      | FOS, GCV       | unable to amplify (0 days)                  | UL97: C592G (6.4)                      | GCV                  | NONE                                         |
| AA8_23   | Patient-29 | 33  | 3213                    | KIDNEY    | UNKNOWN    | VCV            | NO                                          | NONE                                   | NA                   | NONE                                         |
| AA7_10   | Patient-29 | 34  | 3348                    | KIDNEY    | UNKNOWN    | VCV            | NO                                          | UL54: T503I (41.6), UL97: C603W (14.4) | GCV, CDV             | NONE                                         |
| AA5_18   | Patient-30 | 26  | 717                     | HSCT      | D+/R+      | VCV, GCV, FOS  | UL97: H520Q; UL54: VARIANT A692V (+17 days) | UL97_ H520Q (77.3)                     | GCV                  | UL54: A692V (98.9); UL97: NONE               |
| AA5_22   | Patient-31 | 62  | 727                     | HSCT      | D-/R+      | GCV, FOS       | NO                                          | NONE                                   | NA                   | NONE                                         |
| AA8_02   | Patient-32 | 54  | 3270                    | HSCT      | D+/R+      | GCV, FOS       | NO                                          | NONE                                   | NA                   | NONE                                         |
| AA8_14   | Patient-32 | 54  | 3618                    | HSCT      | D+/R+      | GCV, FOS       | UL97: M460V (-9 days)                       | UL97: M460V (68.6), L595S (25.9)       | GCV                  | NONE                                         |
| AA7_24   | Patient-33 | 68  | 8315                    | HSCT      | D+/R+      | GCV            | NO                                          | NONE                                   | NA                   | NONE                                         |
| AA7_02   | Patient-34 | 51  | 1146                    | HSCT      | UNKNOWN    | VCV, GCV       | NO                                          | NONE                                   | NA                   | NONE                                         |
| AA8_19   | Patient-35 | 66  | 3303                    | HSCT      | D+/R-      | GCV            | NO                                          | NONE                                   | NA                   | NONE                                         |
| AA8_03   | Patient-35 | 66  | 6315                    | HSCT      | D+/R-      | GCV            | NO                                          | NONE                                   | NA                   | NONE                                         |
| AA8_18   | Patient-35 | 66  | 1809                    | HSCT      | D+/R-      | GCV            | NO                                          | NONE                                   | NA                   | NONE                                         |

<sup>a</sup>copies/mL plasma

<sup>b</sup> Shown in parentheses is the timing of the most recent genotypic drug resistance testing at a reference laboratory, if one was available within 21 days of the specimen tested in this study.

**Supplemental Table 2. Distribution of primer pairs in the primer half-plate of the integrated fluidic circuit (IFC) of the Access Array.**

| <b>Well #</b> | <b>Primer pair(s)</b> | <b>Well #</b> | <b>Primer pair(s)</b> | <b>Well #</b> | <b>Primer pair(s)</b> |
|---------------|-----------------------|---------------|-----------------------|---------------|-----------------------|
| 1             | POL_D23+PT_I23        | 9             | POL_D23               | 17            | POL_L11               |
| 2             | POL_E44+PT_H22        | 10            | POL_E44               | 18            | POL_L11               |
| 3             | POL_F45               | 11            | POL_F54               | 19            | POL_N22+POL_D23       |
| 4             | POL_G45               | 12            | POL_G54               | 20            | POL_N22               |
| 5             | POL_H65               | 13            | POL_H65               | 21            | PT_G45                |
| 6             | POL_I46               | 14            | POL_I54               | 22            | PT_G65                |
| 7             | POL_J56+PT_G45        | 15            | POL_J56               | 23            | PT_H22                |
| 8             | POL_K23               | 16            | POL_K23               | 24            | PT_I23                |

**Supplemental Table 3. UL54 mutations that have been confirmed phenotypically and were considered accepted drug resistance mutations in this study.**

| Mutation             | Reference | Pubmed ID          | Mutation             | Reference | Pubmed ID          | Mutation             | Reference | Pubmed ID |
|----------------------|-----------|--------------------|----------------------|-----------|--------------------|----------------------|-----------|-----------|
| <b>Substitutions</b> |           |                    | <b>Substitutions</b> |           |                    | <b>Substitutions</b> |           |           |
| A987G                | (1, 2)    | 8381637, 9621055   | T700A                | (2, 3)    | 8627655, 9621055   | D413A                | (4)       | 17157554  |
| L957F*               | (5)       | 21709106           | F595I*               | (5)       | 21709106           | F412L                | (6)       | 21295516  |
| V946L*               | (5)       | 21709106           | D588E*               | (2)       | 9621055            | F412C                | (2)       | 9621055   |
| L862F*               | (5)       | 21709106           | D588N                | (7, 8)    | 15634973, 11595579 | F412S                | (6)       | 21295516  |
| G841A                | (9)       | 17709468           | S585A*               | (5)       | 21709106           | F412V                | (2)       | 9621055   |
| T838A                | (7)       | 15634973           | Q578H                | (10, 11)  | 12637079, 18712833 | F412L                | (6)       | 21295516  |
| A834P                | (12)      | 17043128           | T552N*               | (5)       | 21709106           | N410K                | (13)      | 12825168  |
| P829S*               | (5)       | 21709106           | L545W                | (6)       | 21295516           | N408S                | (14)      | 23415883  |
| T821I                | (2)       | 9621055            | L545S                | (5, 15)   | 21709106, 9621055  | N408K                | (12)      | 17043128  |
| T813S                | (9)       | 17709468           | C539R*               | (5)       | 21709106           | D301N                | (13)      | 12825168  |
| V812L                | (5, 15)   | 21709106, 9721246  | P522S                | (2)       | 9621055            |                      |           |           |
| A809V                | (16)      | 9697736            | P522A                | (17)      | 18502683           |                      |           |           |
| K805Q                | (2)       | 9621055            | I521T                | (17)      | 18502683           |                      |           |           |
| L802V*               | (5)       | 21709106, 9621055  | L516R                | (13)      | 12825168           |                      |           |           |
| L802M                | (5)       | 21709106, 9621055  | K513N                | (15)      | 9721246            | <b>Deletions</b>     |           |           |
| V787L                | (5)       | 21709106, 12599051 | K513E                | (2)       | 9621055            | del 981–982          | (13)      | 12825168  |
| V781I                | (2, 8)    | 11595579, 9621055  | T503I                | (13)      | 12825168           | del 524              | (14)      | 23415883  |
| L776M                | (18)      | 18419454           | L501I                | (2)       | 9621055            |                      |           |           |
| E756D                | (13)      | 12825168           | K500N                | (5)       | 21709106           |                      |           |           |
| E756Q                | (19)      | 12599051           | N495K                | (20)      | 16856628           |                      |           |           |
| E756K                | (13)      | 12825168           | P488R*               | (5)       | 21709106           |                      |           |           |
| V715M                | (2, 3)    | 8627655, 9621055   | D413E                | (13, 21)  | 12825168, 20876378 |                      |           |           |

\* the clinical significance of these mutations is unclear because of low levels of resistance in phenotypic assays or because the mutation has only been identified in laboratory experiments and not authenticated in clinical isolates or sequences.

**Supplemental Table 4. UL97 mutations that have been confirmed phenotypically and were considered accepted drug resistance mutations in this study.**

| <b>Mutation</b>      | <b>Reference</b> | <b>Pubmed ID</b>  | <b>Mutation</b>      | <b>Reference</b> | <b>Pubmed ID</b>   |
|----------------------|------------------|-------------------|----------------------|------------------|--------------------|
| <b>Substitutions</b> |                  |                   | <b>Substitutions</b> |                  |                    |
| L405P*               | (22)             | 20385869          | K599T                | (23)             | 9864050            |
| M460V                | (22)             | 20385869, 9207351 | C603S                | (22)             | 20385869           |
| M460T                | (22)             | 20385869          | C603R                | (22)             | 20385869, 20138805 |
| M460I                | (24)             | 9207351           | C603W                | (22)             | 20385869, 9207351  |
| V466G*               | (25)             | 20138805          | C607Y                | (26)             | 11807689           |
| H520Q                | (26)             | 11807689          | C607F                | (26)             | 11807689           |
| C592G                | (22)             | 20385869          |                      |                  |                    |
| A594T                | (26)             | 11807689          |                      |                  |                    |
| A594P                | (27)             | 11750939          |                      |                  |                    |
| A594E                | (22)             | 20385869          | <b>Deletions</b>     |                  |                    |
| A594G                | (28)             | 9300382           | del 591–594          | (26)             | 11807689           |
| A594V                | (22, 24)         | 20385869, 9207351 | del 591–607          | (26)             | 11807689           |
| L595S                | (24)             | 9207351           | del 595              | (29)             | 7815545            |
| L595W                | (26)             | 11807689          | del 595–603          | (30)             | 10602745           |
| L595F                | (26)             | 11807689          | del 600              | (26)             | 11807689           |
| E596G                | (26)             | 11807689          | del 601              | (31)             | 15793144           |
| G598S                | (32)             | 11888658          | del 601-603          | (4)              | 17157554           |

\*the clinical significance of these mutations is unclear because of low levels of resistance in phenotypic assays or because the mutation has only been identified in laboratory experiments and not authenticated in clinical isolates or sequences.

## **SUPPLEMENTAL FIGURE LEGENDS**

**Supplemental Figure 1. Visualization of long-range PCR amplification products.** An ethidium bromide stained agarose gel, showing long-range PCR products when the reference AD169 strain was used as template at serial dilutions resulting in 1200 (d1), 400 (d2), 133 (d3), and 44 (d4) copies/mL plasma. Primer sets I and II contain different primer pairs for UL54 and UL97 as described in Table 1. The arrows indicated UL54 and UL97 amplification products. A 1 kb plus ladder was used.

**Supplemental Figure 2. Average read coverage per nucleotide when 24 versus 8 specimens are sequenced.** Sequencing data for the UL54 (A) and UL97 (B) genes are presented as the mean of total reads per nucleotide for the same 8 specimens when they are processed and sequenced alone (black line) or with 16 other specimens for a total of 24 samples in a single run (grey line).

**Supplemental Figure 3. Read coverage per amplicon in the forward and reverse sequencing direction.** The data are based on 24 patient plasma specimens in a single run. Data are presented as box whisker plots of the interquartile ranges (1.5 IQR, Tukey method). Amplicons beginning with the same letter have overlapping coverage (see Table 2). Green: Forward, Red: Reverse.

## SUPPLEMENTAL REFERENCES

1. **Sullivan V, Biron KK, Talarico C, Stanat SC, Davis M, Pozzi LM, Coen DM.** 1993. A point mutation in the human cytomegalovirus DNA polymerase gene confers resistance to ganciclovir and phosphonylmethoxyalkyl derivatives. *Antimicrob Agents Chemother* **37**:19-25.
2. **Cihlar T, Fuller MD, Cherrington JM.** 1998. Characterization of drug resistance-associated mutations in the human cytomegalovirus DNA polymerase gene by using recombinant mutant viruses generated from overlapping DNA fragments. *J Virol* **72**:5927-5936.
3. **Baldanti F, Underwood MR, Stanat SC, Biron KK, Chou S, Sarasini A, Silini E, Gerna G.** 1996. Single amino acid changes in the DNA polymerase confer foscarnet resistance and slow-growth phenotype, while mutations in the UL97-encoded phosphotransferase confer ganciclovir resistance in three double-resistant human cytomegalovirus strains recovered from patients with AIDS. *J Virol* **70**:1390-1395.
4. **Marfori JE, Exner MM, Marousek GI, Chou S, Drew WL.** 2007. Development of new cytomegalovirus UL97 and DNA polymerase mutations conferring drug resistance after valganciclovir therapy in allogeneic stem cell recipients. *J Clin Virol* **38**:120-125.
5. **Gilbert C, Azzi A, Goyette N, Lin SX, Boivin G.** 2011. Recombinant phenotyping of cytomegalovirus UL54 mutations that emerged during cell passages in the presence of either ganciclovir or foscarnet. *Antimicrob Agents Chemother* **55**:4019-4027.
6. **Chou S.** 2011. Phenotypic diversity of cytomegalovirus DNA polymerase gene variants observed after antiviral therapy. *J Clin Virol* **50**:287-291.
7. **Springer KL, Chou S, Li S, Giller RH, Quinones R, Shira JE, Weinberg A.** 2005. How evolution of mutations conferring drug resistance affects viral dynamics and clinical outcomes of cytomegalovirus-infected hematopoietic cell transplant recipients. *J Clin Microbiol* **43**:208-213.
8. **Mousavi-Jazi M, Schloss L, Drew WL, Linde A, Miner RC, Harmenberg J, Wahren B, Brytting M.** 2001. Variations in the cytomegalovirus DNA polymerase and phosphotransferase genes in relation to foscarnet and ganciclovir sensitivity. *J Clin Virol* **23**:1-15.
9. **Chou S, Marousek GI, Van Wechel LC, Li S, Weinberg A.** 2007. Growth and drug resistance phenotypes resulting from cytomegalovirus DNA polymerase region III mutations observed in clinical specimens. *Antimicrob Agents Chemother* **51**:4160-4162.
10. **Mousavi-Jazi M, Schloss L, Wahren B, Brytting M.** 2003. Point mutations induced by foscarnet (PFA) in the human cytomegalovirus DNA polymerase. *J Clin Virol* **26**:301-306.
11. **Oshima K, Kanda Y, Kako S, Asano-Mori Y, Watanabe T, Motokura T, Chiba S, Shiraki K, Kurokawa M.** 2008. Case report: persistent cytomegalovirus (CMV) infection after haploidentical hematopoietic stem cell transplantation using in vivo alemtuzumab: emergence of resistant CMV due to mutations in the UL97 and UL54 genes. *J Med Virol* **80**:1769-1775.
12. **Scott GM, Weinberg A, Rawlinson WD, Chou S.** 2007. Multidrug resistance conferred by novel DNA polymerase mutations in human cytomegalovirus isolates. *Antimicrob Agents Chemother* **51**:89-94.
13. **Chou S, Lurain NS, Thompson KD, Miner RC, Drew WL.** 2003. Viral DNA polymerase mutations associated with drug resistance in human cytomegalovirus. *J Infect Dis* **188**:32-39.
14. **Hantz S, Cotin S, Borst E, Couvreur A, Salmier A, Garrigue I, Merville P, Mengelle C, Attal M, Messerle M, Alain S.** 2013. Novel DNA polymerase mutations conferring cytomegalovirus resistance: Input of BAC-recombinant phenotyping and 3D model. *Antiviral Res* **98**:130-134.
15. **Cihlar T, Fuller MD, Mulato AS, Cherrington JM.** 1998. A point mutation in the human cytomegalovirus DNA polymerase gene selected in vitro by cidofovir confers a slow replication phenotype in cell culture. *Virology* **248**:382-393.
16. **Chou S, Marousek G, Parenti DM, Gordon SM, LaVoy AG, Ross JG, Miner RC, Drew WL.** 1998. Mutation in region III of the DNA polymerase gene conferring foscarnet resistance in cytomegalovirus isolates from 3 subjects receiving prolonged antiviral therapy. *J Infect Dis* **178**:526-530.
17. **Chou S, Marousek G, Li S, Weinberg A.** 2008. Contrasting drug resistance phenotypes resulting from cytomegalovirus DNA polymerase mutations at the same exonuclease locus. *J Clin Virol* **43**:107-109.

18. **Shapira MY, Resnick IB, Chou S, Neumann AU, Lurain NS, Stamminger T, Caplan O, Saleh N, Efferth T, Marschall M, Wolf DG.** 2008. Artesunate as a potent antiviral agent in a patient with late drug-resistant cytomegalovirus infection after hematopoietic stem cell transplantation. *Clin Infect Dis* **46**:1455-1457.
19. **Weinberg A, Jabs DA, Chou S, Martin BK, Lurain NS, Forman MS, Crumpacker C.** 2003. Mutations conferring foscarnet resistance in a cohort of patients with acquired immunodeficiency syndrome and cytomegalovirus retinitis. *J Infect Dis* **187**:777-784.
20. **Ducancelle A, Champier G, Alain S, Petit F, Le Pors MJ, Mazon MC.** 2006. A novel mutation in the UL54 gene of human cytomegalovirus isolates that confers resistance to foscarnet. *Antivir Ther* **11**:537-540.
21. **Chevillotte M, Ersing I, Mertens T, von Einem J.** 2010. Differentiation between polymorphisms and resistance-associated mutations in human cytomegalovirus DNA polymerase. *Antimicrob Agents Chemother* **54**:5004-5011.
22. **Chou S.** 2010. Recombinant phenotyping of cytomegalovirus UL97 kinase sequence variants for ganciclovir resistance. *Antimicrob Agents Chemother* **54**:2371-2378.
23. **Faizi Khan R, Mori S, Eizuru Y, Kumura Ishii K, Minamishima Y.** 1998. Genetic analysis of a ganciclovir-resistant human cytomegalovirus mutant. *Antiviral Res* **40**:95-103.
24. **Smith IL, Cherrington JM, Jiles RE, Fuller MD, Freeman WR, Spector SA.** 1997. High-level resistance of cytomegalovirus to ganciclovir is associated with alterations in both the UL97 and DNA polymerase genes. *J Infect Dis* **176**:69-77.
25. **Martin M, Goyette N, Ives J, Boivin G.** 2010. Incidence and characterization of cytomegalovirus resistance mutations among pediatric solid organ transplant patients who received valganciclovir prophylaxis. *J Clin Virol* **47**:321-324.
26. **Chou S, Waldemer RH, Senters AE, Michels KS, Kemble GW, Miner RC, Drew WL.** 2002. Cytomegalovirus UL97 phosphotransferase mutations that affect susceptibility to ganciclovir. *J Infect Dis* **185**:162-169.
27. **Ijichi O, Michel D, Mertens T, Miyata K, Eizuru Y.** 2002. GCV resistance due to the mutation A594P in the cytomegalovirus protein UL97 is partially reconstituted by a second mutation at D605E. *Antiviral Res* **53**:135-142.
28. **Bourgeois C, Sixt N, Bour JB, Pothier P.** 1997. Value of a ligase chain reaction assay for detection of ganciclovir resistance-related mutation 594 in UL97 gene of human cytomegalovirus. *J Virol Methods* **67**:167-175.
29. **Baldanti F, Silini E, Sarasini A, Talarico CL, Stanat SC, Biron KK, Furione M, Bono F, Palu G, Gerna G.** 1995. A three-nucleotide deletion in the UL97 open reading frame is responsible for the ganciclovir resistance of a human cytomegalovirus clinical isolate. *J Virol* **69**:796-800.
30. **Chou S, Meichsner CL.** 2000. A nine-codon deletion mutation in the cytomegalovirus UL97 phosphotransferase gene confers resistance to ganciclovir. *Antimicrob Agents Chemother* **44**:183-185.
31. **Hantz S, Michel D, Fillet AM, Guignon V, Champier G, Mazon MC, Bensman A, Denis F, Mertens T, Dehee A, Alain S.** 2005. Early selection of a new UL97 mutant with a severe defect of ganciclovir phosphorylation after valganciclovir prophylaxis and short-term ganciclovir therapy in a renal transplant recipient. *Antimicrob Agents Chemother* **49**:1580-1583.
32. **Baldanti F, Michel D, Simoncini L, Heuschmid M, Zimmermann A, Minisini R, Schaarschmidt P, Schmid T, Gerna G, Mertens T.** 2002. Mutations in the UL97 ORF of ganciclovir-resistant clinical cytomegalovirus isolates differentially affect GCV phosphorylation as determined in a recombinant vaccinia virus system. *Antiviral Res* **54**:59-67.



M

Primer set I

Primer set II

I

II

d1

d2

d3

d4

d1

d2

d3

d4

ntc

ntc

UL54

UL97

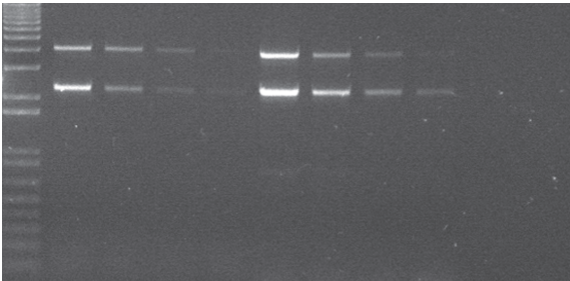

**A****UL54**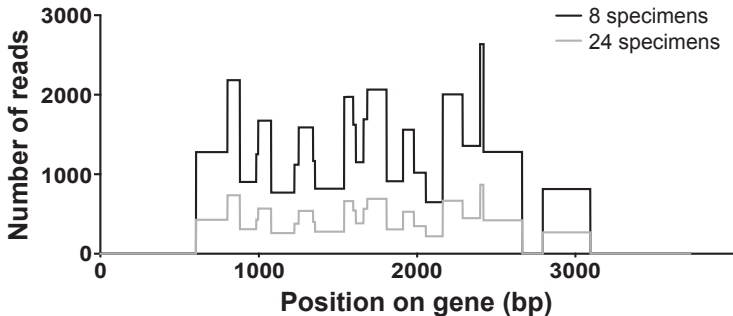**B****UL97**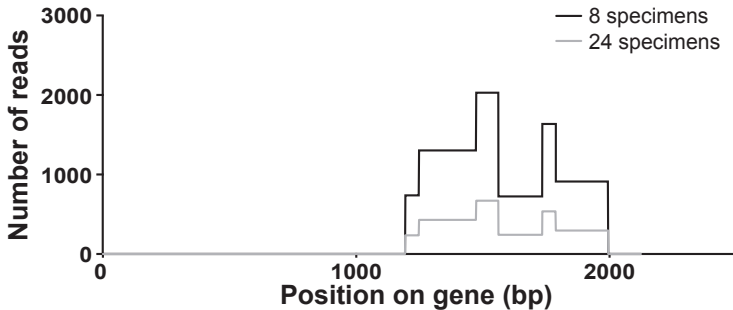

A

UL54

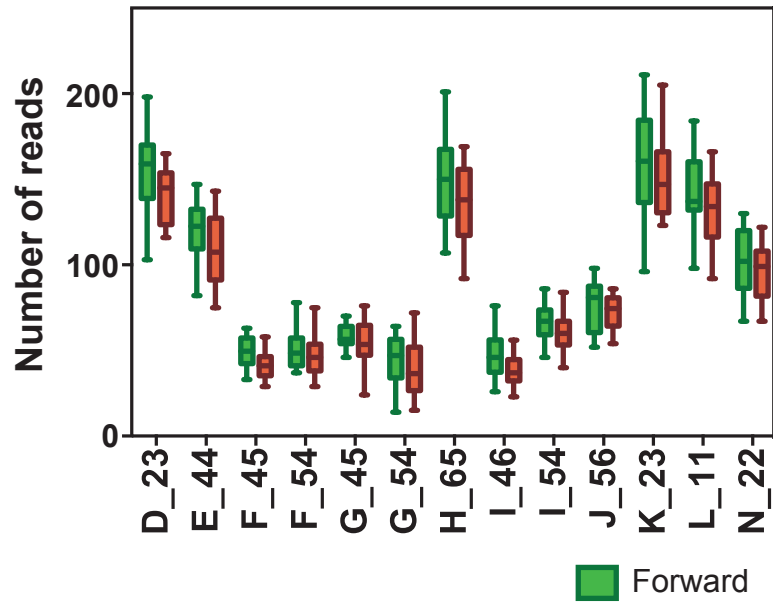

B

UL97

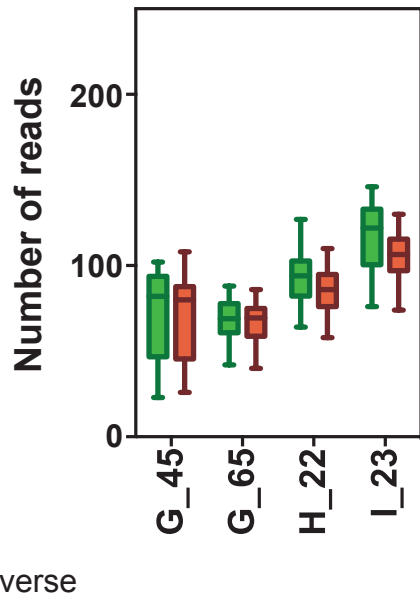

Supplement: JCM.01605-13_zjm999092904so1.pdf [file JCM.01605-13_zjm999092904so1.pdf]
